# Supplementary material
Source: publisher figshare collection journal article supplement (https://acs.figshare.com/ndownloader/files/4261729)

**M.S. No. jp-2011-03978v.R1**

# **Supporting Information**

## **(Revised)**

**Title:** Probing the Role of Chain Length on the Diffusion Dynamics of  $\pi$ -Conjugated Polymers by Fluorescence Correlation Spectroscopy

**Authors:** A.V. R. Murthy, Mahima Goel, Shivaprasad Patil<sup>1\*</sup> and M. Jayakannan<sup>2\*</sup>

---

<sup>1</sup> Corresponding author: [s.patil@iiserpune.ac.in](mailto:s.patil@iiserpune.ac.in)

<sup>2</sup> Corresponding author: [jayakannan@iiserpune.ac.in](mailto:jayakannan@iiserpune.ac.in)

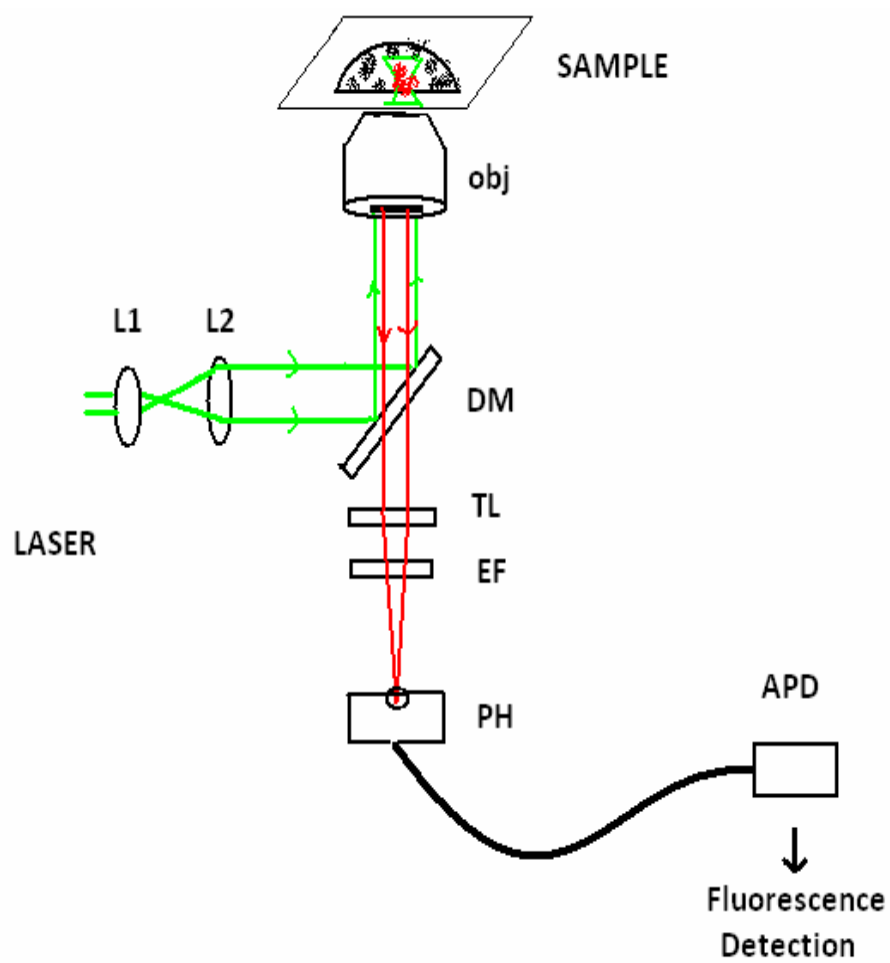

Fig 1: Block Diagram of FCS Setup

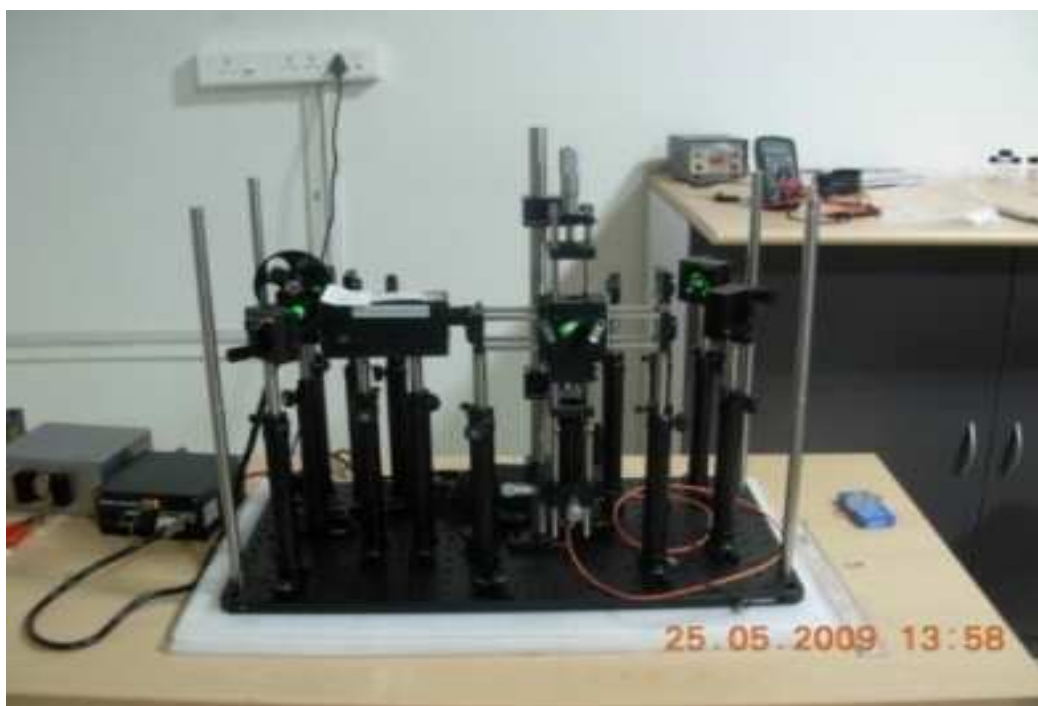

Fig 2: Home built FCS Instrument

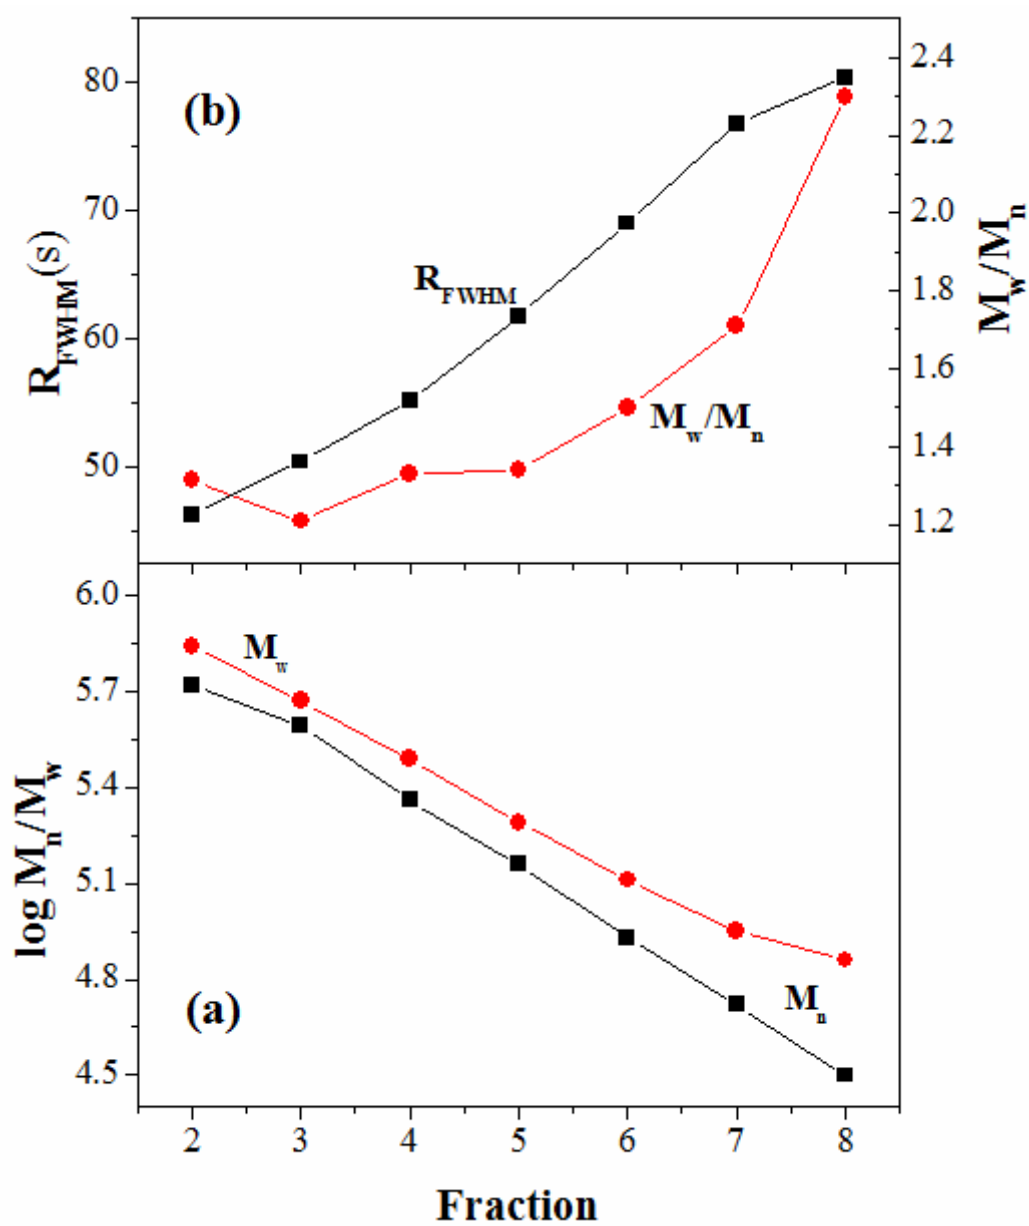

**Figure 3.** Plots of molecular weights  $M_n$  (a) and  $M_w$ (b) versus fractions numbers.

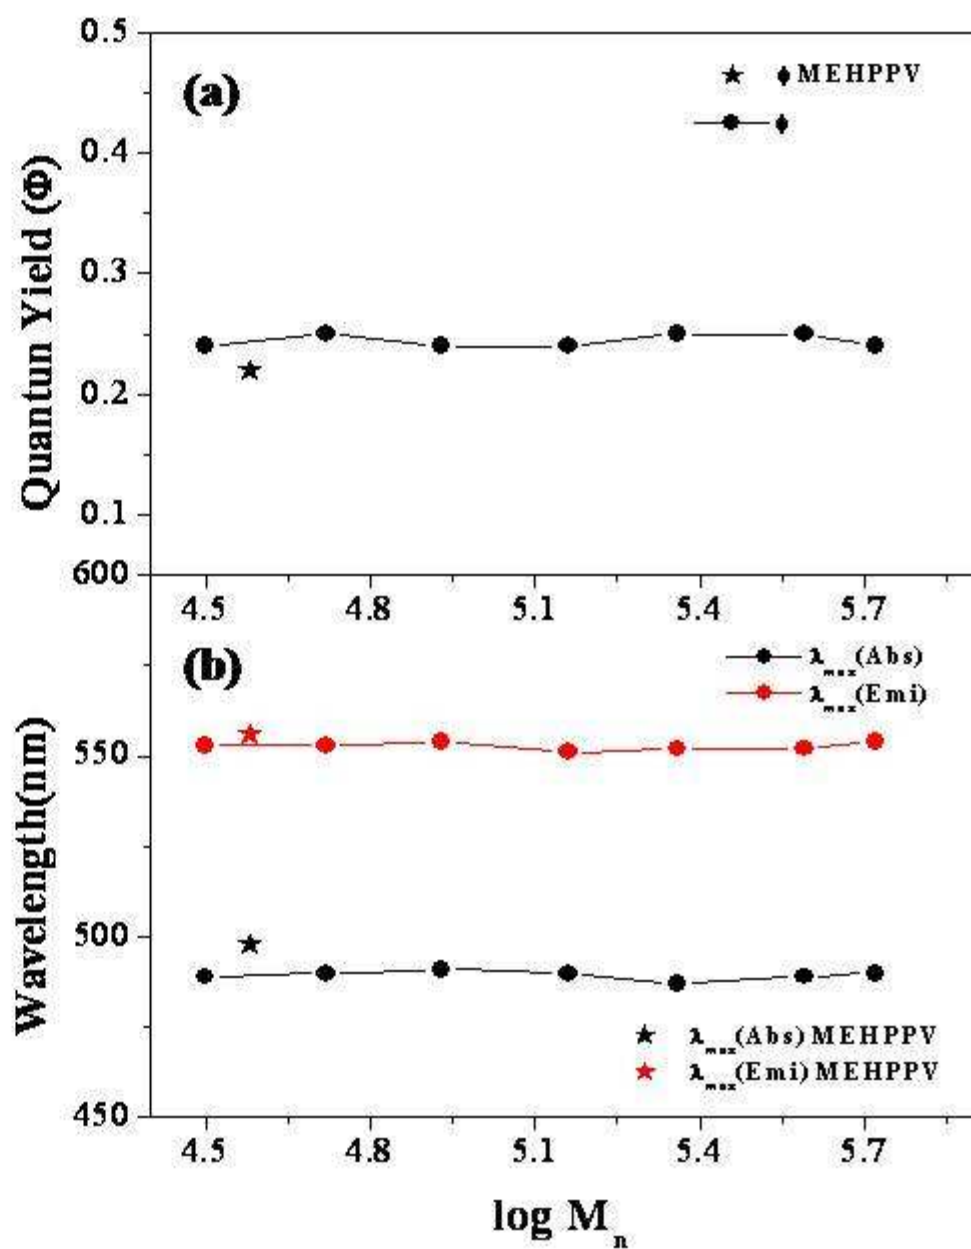

**Figure 4.** Plots of absorbance and emission maxima (c) and quantum yield (d) versus  $M_n$ . The values showed (\*) in c and d are with respect to un-fractionated sample.

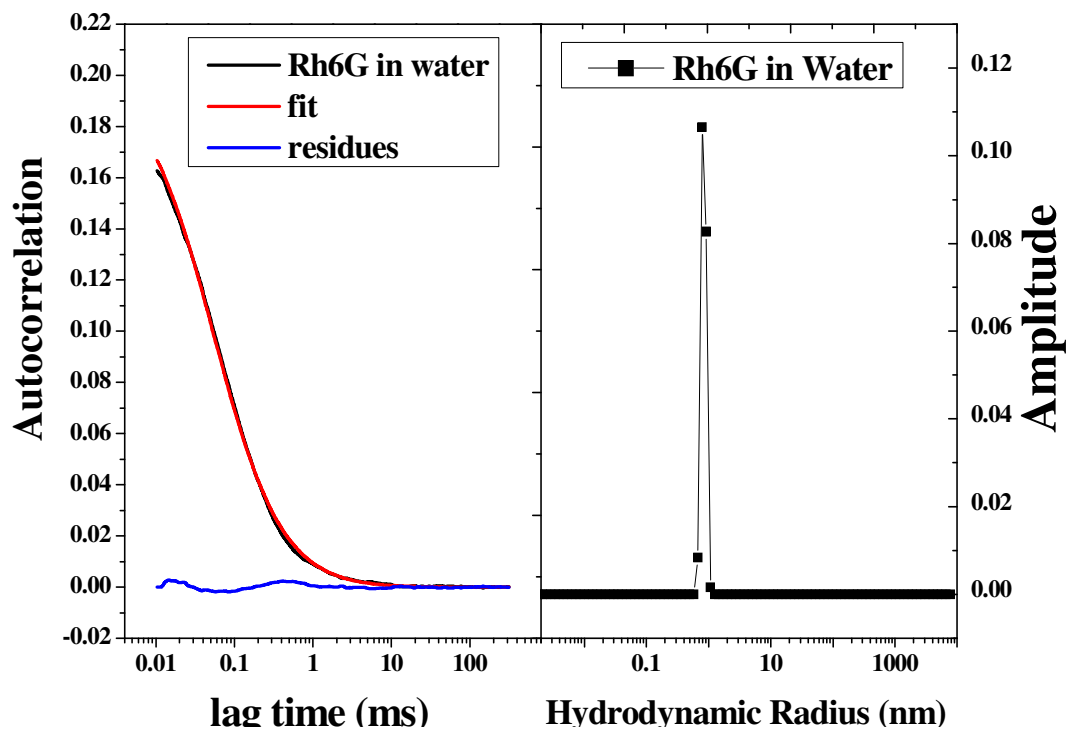

**Figure 5:** Autocorrelation curve of Rhodamine 6G in water.

**Note:** This is used for Calibration the FCS Setup. The FCS Focal Volume is found to be 0.265fL with a radial dimension  $r = 0.238\mu\text{m}$ , which is used in equation (3)

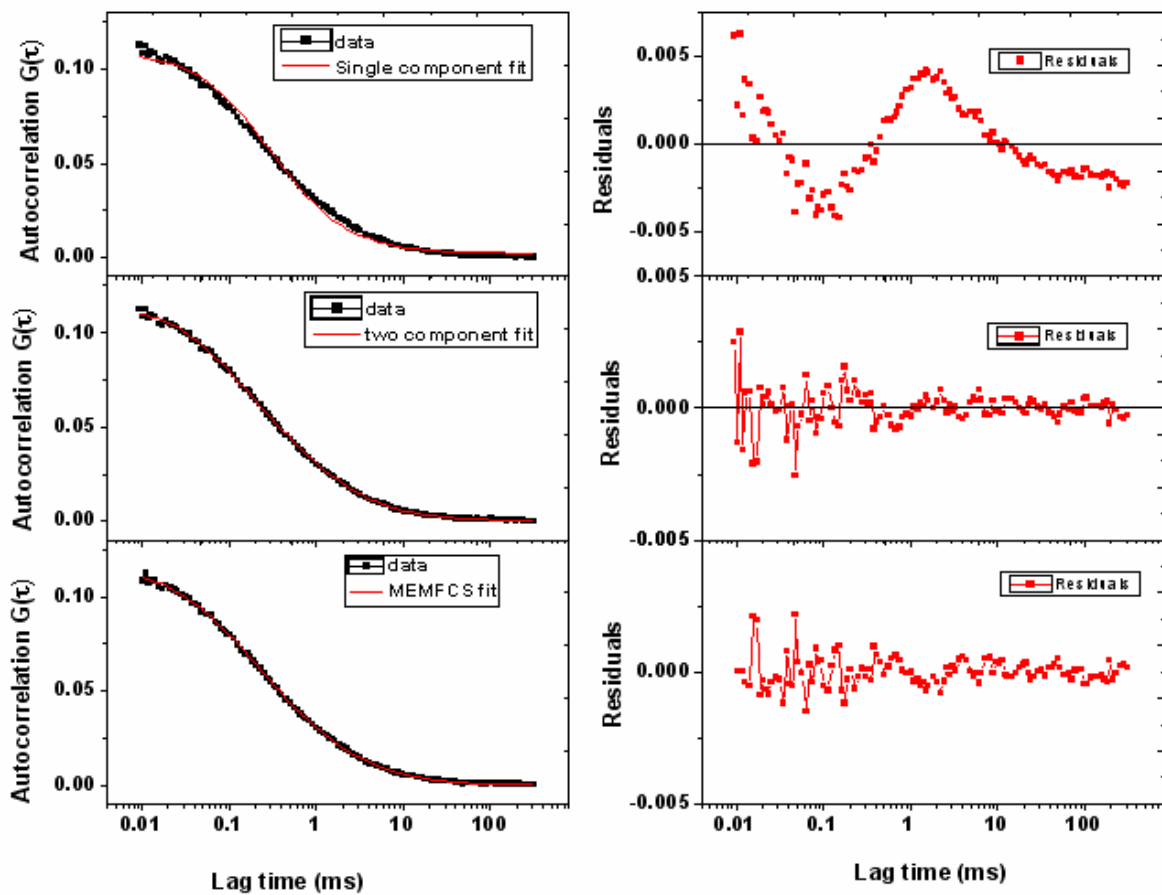

**Figure 6.** Different Fitting for FCS data with residues. It was observed that MEM program is fitting with less residues

**Note:** MEMFCS method gave good fitting with less residuals compared to other two methods

**Table 1.** FCS data for fraction for F-5

| Time Interval                     | Diffusion Time      | Diffusion Coefficient( $\mu\text{m}^2/\text{s}$ ) |
|-----------------------------------|---------------------|---------------------------------------------------|
| 100                               | 0.191               | 74.5                                              |
| 300                               | 0.167               | 85.2                                              |
| 500                               | 0.246               | 57.8                                              |
| 700                               | 0.216               | 65.8                                              |
| 900                               | 0.147               | 96.8                                              |
| Temperature( $^{\circ}\text{C}$ ) | Diffusion time (ms) | Diffusion Coefficient( $\mu\text{m}^2/\text{s}$ ) |
| 30                                | 0.175               | 81.3                                              |
| 40                                | 0.175               | 81.3                                              |
| 50                                | 0.341               | 41.3                                              |
| 60                                | 0.341               | 41.3                                              |
| 70                                | 0.389               | 36.5                                              |
| 80                                | 0.389               | 36.5                                              |
| Concentration (nM)                | Diffusion time (ms) | Diffusion Coefficient( $\mu\text{m}^2/\text{s}$ ) |
| 1                                 | 0.147               | 96.8                                              |
| 10                                | 0.216               | 65.8                                              |
| 15                                | 0.466               | 30.5                                              |
| 20                                | 0.41                | 34.5                                              |



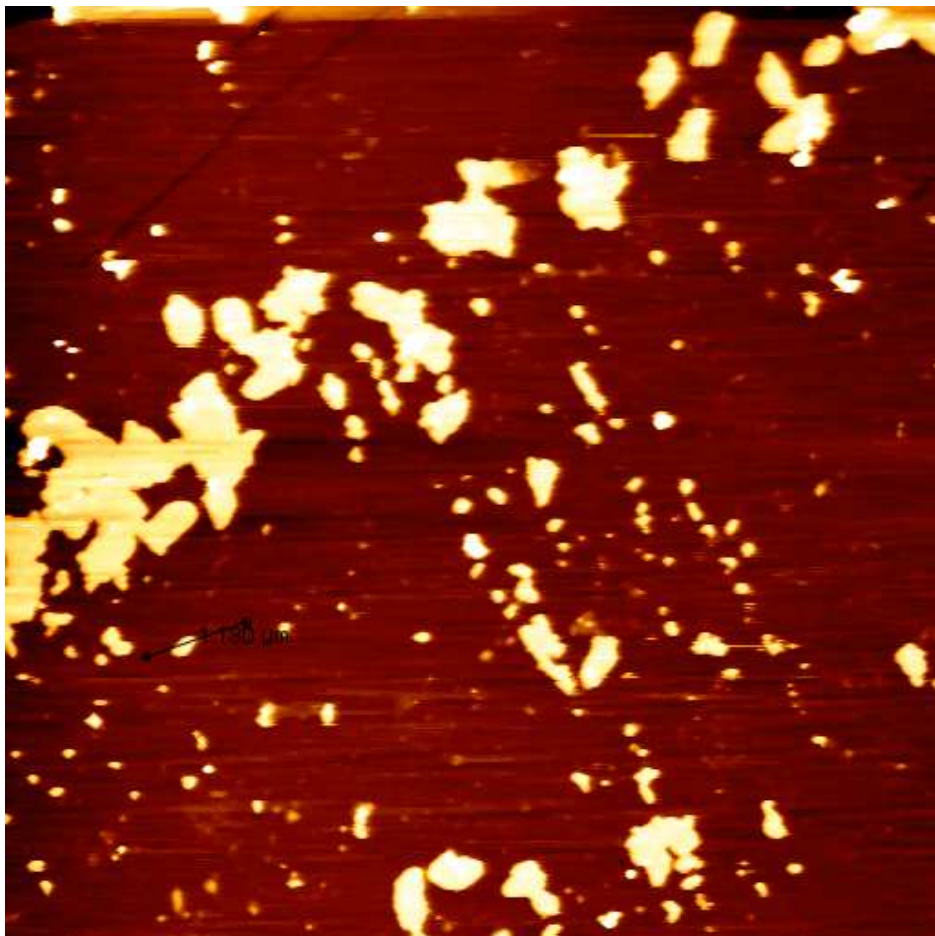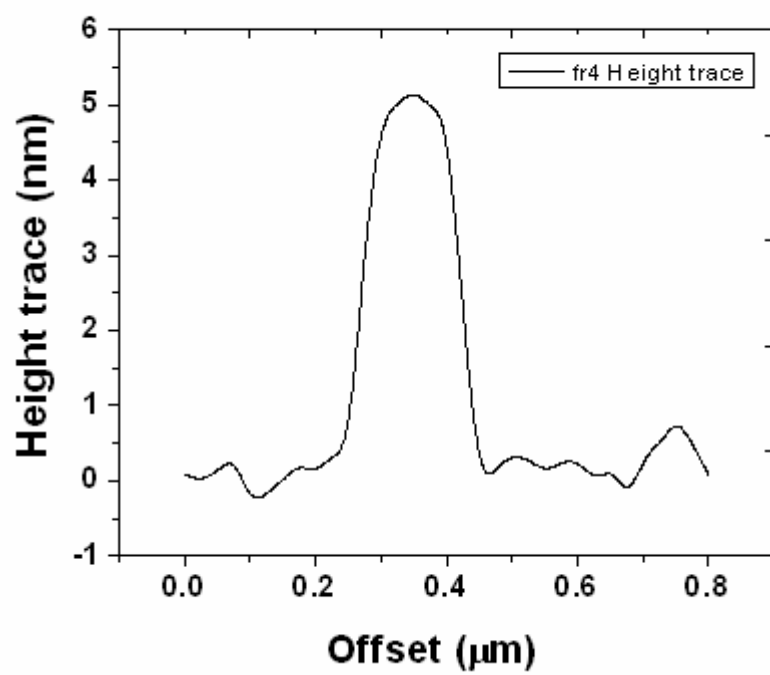

**Figure 7.** AFM image of fraction-4

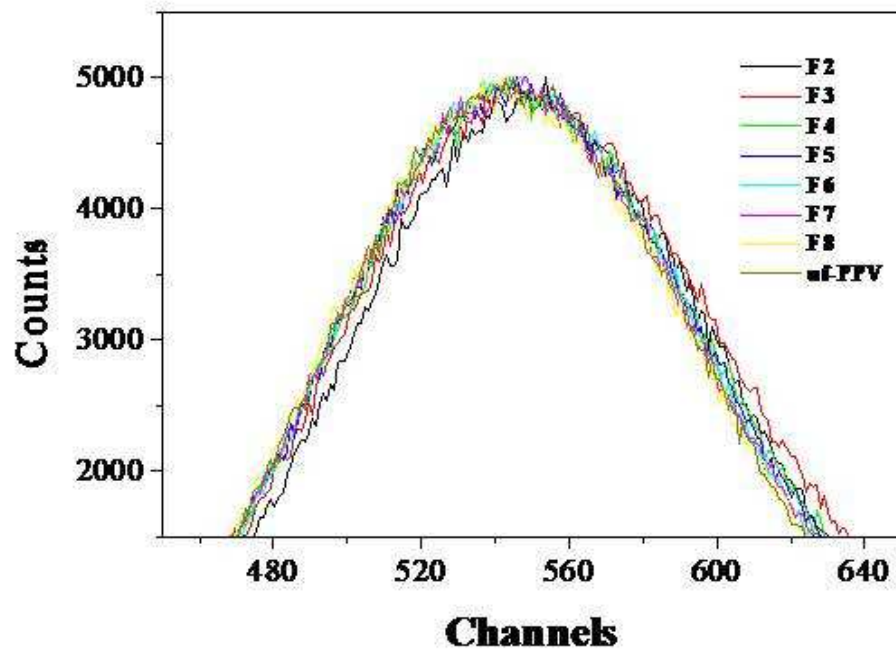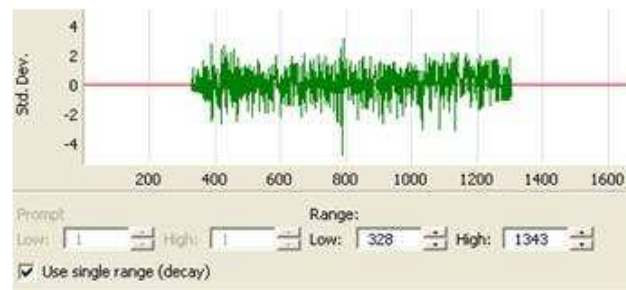

**F4**

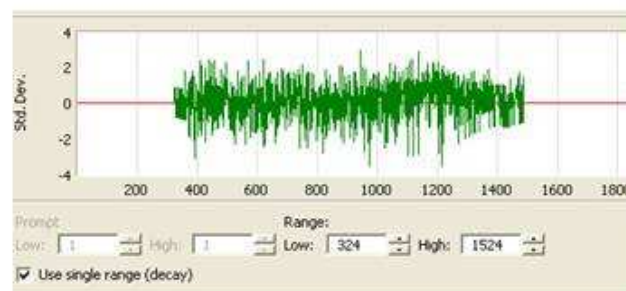

**uf-PPV**

**Figure 8:** life time decay profiles of all the polymer samples

**1-(2-ethylhexyloxy)-4-methoxybenzene**

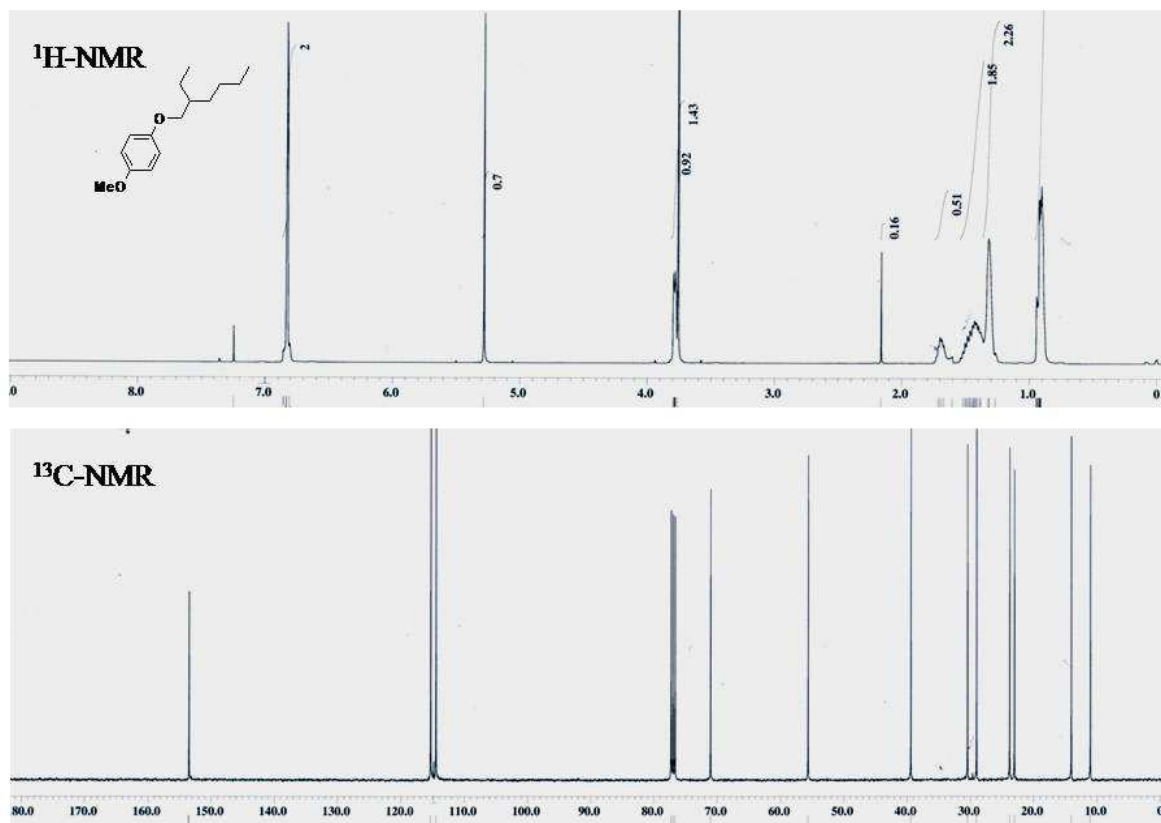

**1, 4-bis (bromomethyl)-2-(2-ethylhexyloxy)-5-methoxybenzene**

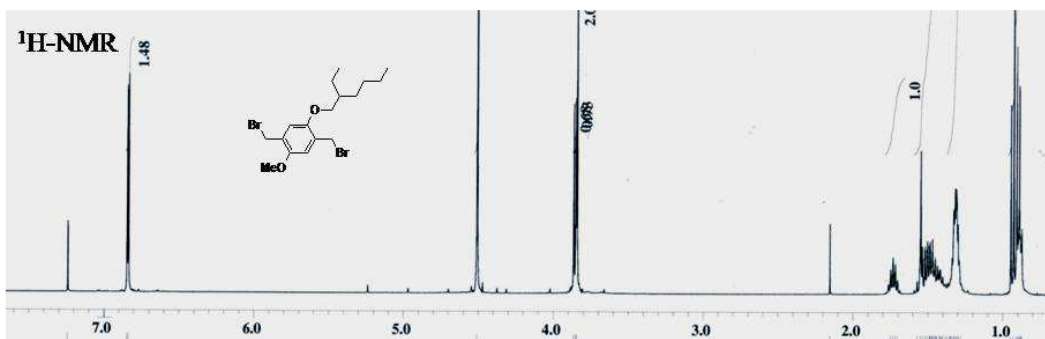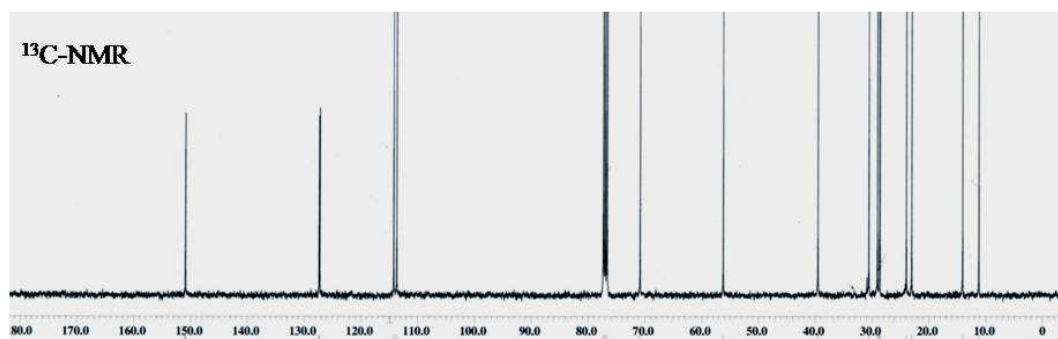

**MEH-PPV**

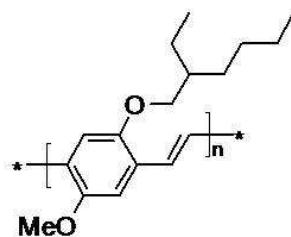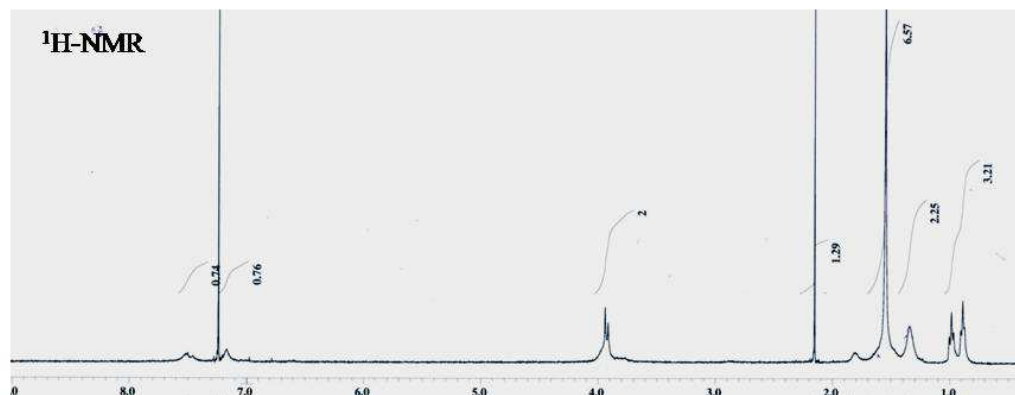

Supplement: Supplementary file 1 [file 4261729]
